# Supplementary material for: Lung Cancer Mortality Trends in a Brazilian City with a Long History of Asbestos Consumption
Source: Int J Environ Res Public Health. 2019 Jul 17;16(14):2548. doi: 10.3390/ijerph16142548 (PMC6679146; doi:10.3390/ijerph16142548)
Supplement: Supplementary file 1 [file ijerph-16-02548-s001.zip]

Archive with 7 entries (7 files):
- certificado_aje.pdf
- Figure S1.doc
- Figure S2.doc
- Figure S3.doc
- Table S1.doc
- Table S2.doc
- Table S3.doc
